# Supplementary material for: 3-Methylation alters excited state decay in photoionised uracil
Source: Royal Society of Chemistry journal article supplement (doi:10.1039/d2cp03460c), 2022-01-01
Supplement: d2cp03460c1.pdf [file d2cp03460c1.pdf]

# Electronic Supplementary Information for

## 3-methylation alters excited state decay in photoionised uracil

Javier Segarra-Martí,<sup>1,\*</sup> Thierry Tran<sup>2,3</sup> and Michael J. Bearpark<sup>2,\*</sup>

<sup>1</sup> Instituto de Ciencia Molecular, Universitat de Valencia, P. O. Box 22085, ES-46071 Valencia, Spain. E-mail: [Javier.segarra@uv.es](mailto:Javier.segarra@uv.es)

<sup>2</sup> Department of Chemistry, Molecular Sciences Research Hub, Imperial College London, White City Campus, 80 Wood Lane, W12 0BZ London, UK. E-mail: [m.bearpark@imperial.ac.uk](mailto:m.bearpark@imperial.ac.uk)

<sup>3</sup> Université de Nantes, CNRS, CEISAM UMR 6230, F-44000 Nantes, France.

### CONTENTS

**Table S1.** Vertical ionisation potentials (in eV) of the three lowest-lying cationic states of 1-methyl-uracil computed with different zeroth-order CASPT2 Hamiltonians, IPEA values being provided in a.u.

**Table S2.** Vertical ionisation potentials (in eV) of the three lowest-lying cationic states of 3-methyl-uracil computed with different zeroth-order CASPT2 Hamiltonians, IPEA values being provided in a.u.

**Table S3.** Conical intersection parameters for the different crossings found in Ura<sup>+</sup>, 1mUra<sup>+</sup>, 3mUra<sup>+</sup> and 5mUra<sup>+</sup> at the XMS-CASPT2 level of theory. Pitch ( $\delta$ ), asymmetry ( $\Delta$ ) and relative tilt ( $\sigma$ ) are given in atomic units, whereas tilt headings ( $\sigma_s$ ) are in degrees.

**Figure S1.** Structure of the effective 3-state conical intersection of 3mUra<sup>+</sup>.

**Table S4.** Cartesian coordinates (in Å) of the key structures optimised for uracil.

**Table S5.** Cartesian coordinates (in Å) of the key structures optimised for 1-methyl-uracil.

**Table S6.** Cartesian coordinates (in Å) of the key structures optimised for 3-methyl-uracil.

**Table S7.** Cartesian coordinates (in Å) of the key structures optimised for 5-methyl-uracil.

**Table S1.** Vertical ionisation potentials (in eV) of the three lowest-lying cationic states of 1-methyl-uracil computed with different zeroth-order CASPT2 Hamiltonians, IPEA values being provided in a.u.

|                   |             | ${}^2\pi_{\text{H}}^+$ | ${}^2\text{nO}^+$ | ${}^2\pi_{\text{H-1}}^+$ |
|-------------------|-------------|------------------------|-------------------|--------------------------|
| <b>CASSCF</b>     | -           | 7.917                  | 9.214             | 9.339                    |
| <b>CASPT2</b>     | IPEA = 0    | 9.060                  | 9.667             | 10.158                   |
|                   | IPEA = 0.25 | 9.255                  | 9.914             | 10.398                   |
| <b>MS-CASPT2</b>  | IPEA = 0    | 9.199                  | 9.793             | 10.241                   |
|                   | IPEA = 0.25 | 9.362                  | 10.014            | 10.465                   |
| <b>XMS-CASPT2</b> | IPEA = 0    | 9.754                  | 10.346            | 10.705                   |
|                   | IPEA = 0.25 | 9.869                  | 10.545            | 10.877                   |
| <b>Average</b>    | -           | <b>9.417</b>           | <b>10.047</b>     | <b>10.474</b>            |
| <b>St Dev</b>     | -           | 0.323                  | 0.336             | 0.274                    |
| <b>Variance</b>   | -           | 0.569                  | 0.580             | 0.524                    |

**Table S2.** Vertical ionisation potentials (in eV) of the three lowest-lying cationic states of 3-methyl-uracil computed with different zeroth-order CASPT2 Hamiltonians, IPEA values being provided in a.u.

|                   |             | ${}^2\pi_{\text{H}}^+$ | ${}^2\text{nO}^+$ | ${}^2\pi_{\text{H-1}}^+$ |
|-------------------|-------------|------------------------|-------------------|--------------------------|
| <b>CASSCF</b>     | -           | 8.313                  | 8.976             | 9.226                    |
| <b>CASPT2</b>     | IPEA = 0    | 9.123                  | 9.507             | 9.754                    |
|                   | IPEA = 0.25 | 9.324                  | 9.762             | 9.973                    |
| <b>MS-CASPT2</b>  | IPEA = 0    | 9.166                  | 9.533             | 9.779                    |
|                   | IPEA = 0.25 | 9.359                  | 9.786             | 9.988                    |
| <b>XMS-CASPT2</b> | IPEA = 0    | 9.212                  | 9.628             | 9.809                    |
|                   | IPEA = 0.25 | 9.395                  | 9.894             | 10.009                   |
| <b>Average</b>    | -           | <b>9.263</b>           | <b>9.685</b>      | <b>9.885</b>             |
| <b>St Dev</b>     | -           | 0.111                  | 0.154             | 0.116                    |
| <b>Variance</b>   | -           | 0.333                  | 0.392             | 0.341                    |

**Table S3.** Conical intersection parameters for the different crossings found in  $\text{Ura}^+$ ,  $1\text{mUra}^+$ ,  $3\text{mUra}^+$  and  $5\text{mUra}^+$  at the XMS-CASPT2 level of theory. Pitch ( $\delta$ ), asymmetry ( $\Delta$ ) and relative tilt ( $\sigma$ ) are given in atomic units, whereas tilt headings ( $\sigma_s$ ) are in degrees.

|                                                        | $\delta$ | $\Delta$ | $\sigma$ | $\sigma_s$ (°) | <b>P</b> | <b>B</b> | <b>Intersection Type</b> |
|--------------------------------------------------------|----------|----------|----------|----------------|----------|----------|--------------------------|
| $({}^2\text{nO}^+ / {}^2\pi_{\text{H}}^+)_{\text{CI}}$ |          |          |          |                |          |          |                          |
| <b>Ura<sup>+</sup></b>                                 | 0.028    | 0.940    | 3.094    | 0.000          | 4.935    | 1.739    | Sloped, single-path      |
| <b>1mUra<sup>+</sup></b>                               | 0.028    | 0.944    | 3.893    | 0.139          | 7.797    | 2.033    | Sloped, single-path      |
| <b>3mUra<sup>+</sup></b>                               | 0.125    | 0.060    | 0.896    | 67.251         | 0.839    | 5.596    | Peaked, single-path      |
| <b>5mUra<sup>+</sup></b>                               | 0.030    | 0.961    | 3.308    | 0.047          | 5.582    | 1.802    | Sloped, single-path      |

|                          | $({}^2\pi_{H-1}^+ / {}^2n_{O^+})_{CI}$ |       |       |       |       |       |                     |
|--------------------------|----------------------------------------|-------|-------|-------|-------|-------|---------------------|
| <b>Ura<sup>+</sup></b>   | 0.037                                  | 0.845 | 1.667 | 0.012 | 1.506 | 1.217 | Sloped, single-path |
| <b>1mUra<sup>+</sup></b> | 0.019                                  | 0.328 | 2.486 | 1.336 | 4.657 | 2.844 | Sloped, single-path |
| <b>3mUra<sup>+</sup></b> | 0.090                                  | 0.974 | 0.140 | 0.017 | 0.010 | 0.217 | Peaked, bifurcating |
| <b>5mUra<sup>+</sup></b> | 0.036                                  | 0.842 | 1.674 | 0.111 | 1.521 | 1.229 | Sloped, single-path |

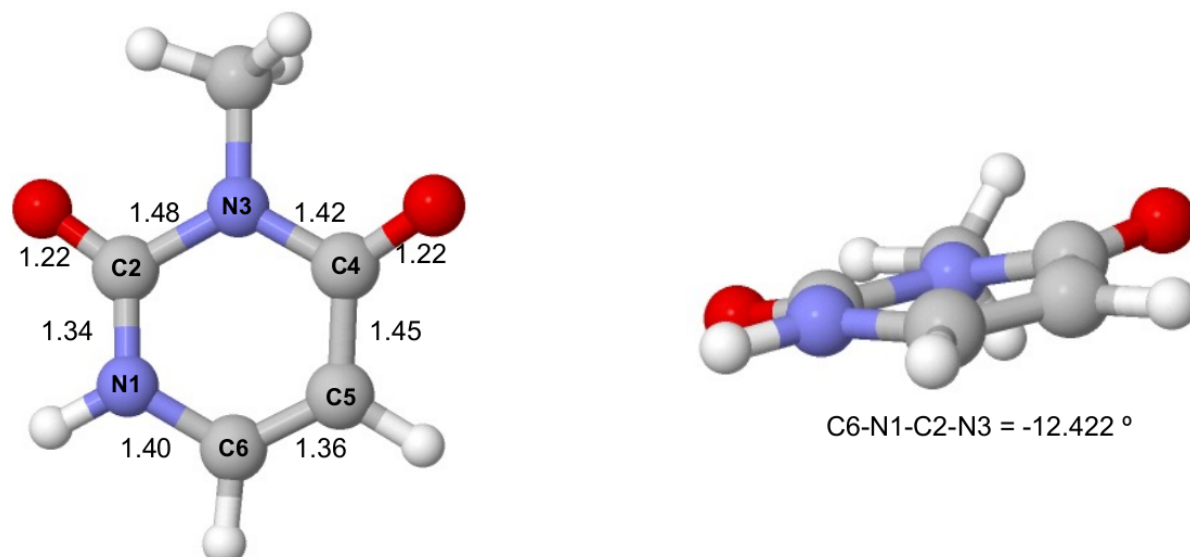

**Figure S1.** Structure of the effective 3-state conical intersection of 3mUra<sup>+</sup>.

**Table S4.** Cartesian coordinates (in Å) of the key structures optimised for uracil.

**FC @ MP2**

|   |             |             |             |
|---|-------------|-------------|-------------|
| N | 0.03469954  | 0.98940454  | -0.00002904 |
| N | -1.18206818 | -0.98647191 | 0.00001387  |
| C | -1.22813655 | 0.40796837  | 0.00000571  |
| C | -0.00812071 | -1.71531831 | -0.00001675 |
| C | 1.21293151  | -1.10717337 | 0.00000118  |
| C | 1.29727452  | 0.35404295  | -0.00000397 |
| O | 2.33192137  | 1.01913064  | 0.00000447  |
| O | -2.27685365 | 1.04332323  | 0.00002159  |
| H | -0.12790040 | -2.80102991 | -0.00005690 |
| H | 0.04294107  | 2.01313969  | -0.00001115 |
| H | -2.09042036 | -1.44813479 | 0.00004101  |
| H | 2.13547884  | -1.68641014 | 0.00002999  |

**$({}^2\pi_{H^+})_{min}$  @ XMS-CASPT2**

|   |              |              |              |
|---|--------------|--------------|--------------|
| N | 0.03485001   | 1.031469163  | -2.91047E-05 |
| N | -1.153723866 | -1.012897696 | 7.40848E-06  |
| C | -1.214751733 | 0.437170583  | 0.00032121   |
| C | -0.035063268 | -1.747903382 | 0.000171453  |
| C | 1.208023777  | -1.096335679 | -0.000755136 |
| C | 1.289813374  | 0.391791009  | -0.001141964 |

|   |              |              |              |
|---|--------------|--------------|--------------|
| O | 2.33678266   | 0.993771122  | -3.75716E-05 |
| O | -2.285848845 | 0.981522791  | 0.001010728  |
| H | -0.142131121 | -2.83708935  | 0.000983211  |
| H | 0.039265992  | 2.058472071  | 0.00072021   |
| H | -2.079316353 | -1.460297799 | -0.000296339 |
| H | 2.146205914  | -1.657718921 | -0.000422812 |

---

$(^2\pi_H^+)_{\min}$  @ CASSCF

---

|   |             |             |             |
|---|-------------|-------------|-------------|
| N | 0.04023442  | 1.02863030  | -0.00008058 |
| N | -1.13735176 | -1.00405969 | -0.00000998 |
| C | -1.18361997 | 0.44505864  | 0.00003377  |
| C | -0.06604315 | -1.72279567 | -0.00000821 |
| C | 1.21062627  | -1.07550505 | 0.00005671  |
| C | 1.26298914  | 0.36124335  | -0.00001326 |
| O | 2.31947532  | 0.96465037  | -0.00003232 |
| O | -2.25790304 | 0.93939495  | 0.00016977  |
| H | -0.17174387 | -2.80011641 | -0.00004968 |
| H | 0.05671088  | 2.03478172  | -0.00011252 |
| H | -2.05525496 | -1.43976220 | -0.00004978 |
| H | 2.12362673  | -1.64904730 | 0.00009608  |

---

$(^2n_O^+)_{\min}$  @ XMS-CASPT2

---

|   |             |             |             |
|---|-------------|-------------|-------------|
| N | 0.05422745  | 1.01034833  | -0.00019893 |
| N | -1.17468090 | -0.99257115 | 0.00085795  |
| C | -1.23698555 | 0.40038213  | -0.00012924 |
| C | -0.01658089 | -1.71558501 | -0.00084773 |
| C | 1.22449332  | -1.10837187 | 0.00053844  |
| C | 1.22961661  | 0.31959699  | 0.00007811  |
| O | 2.30940113  | 1.00742555  | -0.00012210 |
| O | -2.24540701 | 1.06135201  | -0.00086594 |
| H | -0.12943163 | -2.80318162 | -0.00377131 |
| H | 0.05567492  | 2.04026930  | -0.00065421 |
| H | -2.08555840 | -1.46775018 | 0.00308602  |
| H | 2.15697697  | -1.66944143 | 0.00202895  |

---

$(^2n_O^+)_{\min}$  @ CASSCF

---

|   |             |             |             |
|---|-------------|-------------|-------------|
| N | 0.05820673  | 0.99491641  | -0.00011054 |
| N | -1.16350625 | -0.99130629 | 0.00006484  |
| C | -1.21911555 | 0.39787616  | 0.00006689  |
| C | -0.02554520 | -1.69672861 | -0.00014584 |
| C | 1.20627476  | -1.09230285 | 0.00014002  |
| C | 1.18747697  | 0.30686815  | -0.00002188 |
| O | 2.29637019  | 0.99710748  | -0.00008484 |
| O | -2.20849706 | 1.03573066  | 0.00022856  |
| H | -0.12907665 | -2.77218344 | -0.00059434 |
| H | 0.06465102  | 2.00483202  | -0.00026380 |
| H | -2.05532077 | -1.45808500 | 0.00021533  |
| H | 2.12982781  | -1.64425165 | 0.00050561  |

---

$(^2n_O^+ / ^2\pi_H^+)_{CI}$  @ XMS-CASPT2

---

|   |              |              |              |
|---|--------------|--------------|--------------|
| N | 0.033704871  | 0.997066837  | -2.80464E-05 |
| N | -1.14205763  | -1.028144343 | 8.46683E-06  |
| C | -1.258453816 | 0.355053425  | -3.22798E-05 |
| C | 0.043718487  | -1.704958551 | 4.02175E-05  |
| C | 1.262808413  | -1.078088069 | 4.70968E-05  |
| C | 1.203851216  | 0.342547385  | 2.16963E-05  |
| O | 2.283102945  | 1.071968666  | 3.81007E-05  |
| O | -2.267097987 | 1.002421049  | -6.72055E-05 |
| H | -0.02876077  | -2.795516147 | 8.04349E-05  |
| H | -0.00740054  | 2.022011776  | -5.50344E-05 |
| H | -2.028112128 | -1.535001716 | 1.00544E-05  |
| H | 2.210671314  | -1.612353635 | 6.72055E-05  |

$(^2n_{O^+}/^2\pi_{H^+})_{CI}$  @ CASSCF

---

|   |             |             |             |
|---|-------------|-------------|-------------|
| N | 0.06589133  | 0.99184557  | -0.00000550 |
| N | -1.17890997 | -0.98811089 | -0.00000331 |
| C | -1.23141304 | 0.37868993  | -0.00000267 |
| C | -0.01045436 | -1.69395673 | -0.00000320 |
| C | 1.20483080  | -1.10237711 | 0.00000097  |
| C | 1.17443745  | 0.31196489  | 0.00000162  |
| O | 2.29276068  | 0.99454415  | -0.00000511 |
| O | -2.18536001 | 1.06742230  | 0.00000685  |
| H | -0.11002607 | -2.76869539 | -0.00002160 |
| H | 0.05079858  | 2.00266876  | 0.00001373  |
| H | -2.06220153 | -1.46294931 | 0.00001310  |
| H | 2.13139214  | -1.64857312 | 0.00000512  |

$(^2\pi_{H-1^+}/^2n_{O^+})_{CI}$  @ XMS-CASPT2

---

|   |              |              |              |
|---|--------------|--------------|--------------|
| N | 0.033269358  | 0.983985581  | -2.75172E-05 |
| N | -1.194783768 | -0.992010021 | 5.82095E-06  |
| C | -1.25365418  | 0.386701914  | -1.42878E-05 |
| C | -0.020502434 | -1.722337253 | -6.35012E-06 |
| C | 1.22119023   | -1.14119613  | -0.000106365 |
| C | 1.340922876  | 0.293410654  | -1.69337E-05 |
| O | 2.310104731  | 1.040898567  | 4.76259E-05  |
| O | -2.24830109  | 1.096005473  | 0.000104777  |
| H | -0.154323889 | -2.806745812 | 1.00544E-05  |
| H | 0.057395067  | 2.021047086  | 2.01087E-05  |
| H | -2.099885463 | -1.468832365 | 5.60928E-05  |
| H | 2.132755822  | -1.739962022 | -9.78977E-05 |

$(^2\pi_{H-1^+}/^2n_{O^+})_{CI}$  @ CASSCF

---

|   |             |             |             |
|---|-------------|-------------|-------------|
| N | 0.03837915  | 0.97536890  | -0.00014048 |
| N | -1.18503226 | -0.98595132 | 0.00000905  |
| C | -1.19828853 | 0.36197718  | -0.00003203 |
| C | -0.00342656 | -1.72213732 | -0.00004742 |
| C | 1.20161803  | -1.12235587 | 0.00002364  |
| C | 1.25188898  | 0.32627324  | 0.00007855  |
| O | 2.24363613  | 1.06510559  | 0.00022535  |
| O | -2.17205469 | 1.10001256  | 0.00017561  |

|   |             |             |             |
|---|-------------|-------------|-------------|
| H | -0.12681702 | -2.79305309 | -0.00010456 |
| H | 0.03972860  | 1.99584056  | -0.00023650 |
| H | -2.07635160 | -1.44757406 | 0.00005908  |
| H | 2.12846579  | -1.67103335 | -0.00001028 |

**Table S5.** Cartesian coordinates (in Å) of the key structures optimised for 1-methyl-uracil.

| FC @ MP2 |           |           |           |
|----------|-----------|-----------|-----------|
| N        | 0.040189  | 0.972754  | 0.076330  |
| N        | -1.195977 | -0.994068 | -0.002944 |
| C        | -1.217661 | 0.396493  | 0.080014  |
| C        | -0.014423 | -1.695490 | -0.079947 |
| C        | 1.199693  | -1.097621 | -0.081051 |
| C        | 1.298647  | 0.349460  | 0.001592  |
| O        | 2.330068  | 1.015697  | 0.009992  |
| O        | -2.262399 | 1.035718  | 0.149245  |
| H        | -0.124014 | -2.769627 | -0.140213 |
| H        | 0.047499  | 1.983026  | 0.135884  |
| H        | 2.107272  | -1.675147 | -0.142499 |
| C        | -2.495777 | -1.658322 | -0.003179 |
| H        | -3.087227 | -1.320098 | -0.850272 |
| H        | -2.331136 | -2.729315 | -0.071470 |
| H        | -3.034283 | -1.424303 | 0.911708  |

| $(^2\pi_{\text{H}^+})_{\text{min}}$ @ XMS-CASPT2 |                     |                     |                     |
|--------------------------------------------------|---------------------|---------------------|---------------------|
| N                                                | 5.496603149594e-02  | 1.020844531920e+00  | 7.873272304683e-02  |
| N                                                | -1.188388011127e+00 | -1.018926269083e+00 | -4.643741492775e-03 |
| C                                                | -1.197643184131e+00 | 4.597137571593e-01  | 4.040530703639e-02  |
| C                                                | -5.975824651644e-02 | -1.735838810638e+00 | -3.069234310425e-02 |
| C                                                | 1.193634245954e+00  | -1.108901032109e+00 | -2.997892999164e-03 |
| C                                                | 1.297996296045e+00  | 3.584671053524e-01  | 3.485655146561e-02  |
| O                                                | 2.354470789109e+00  | 9.584324414809e-01  | 2.491273318918e-02  |
| O                                                | -2.254142578850e+00 | 1.033453918020e+00  | 4.539693508717e-02  |
| H                                                | -1.606856108613e-01 | -2.824496986402e+00 | -8.228617378459e-02 |
| H                                                | 7.838701606723e-02  | 2.046209817742e+00  | 1.055279275002e-01  |
| H                                                | 2.118586772514e+00  | -1.690178070902e+00 | -2.552036673926e-02 |
| C                                                | -2.521223743441e+00 | -1.646156322731e+00 | -2.043156899483e-02 |
| H                                                | -3.079835193484e+00 | -1.260411620338e+00 | -8.868155007995e-01 |
| H                                                | -2.393401525349e+00 | -2.733493935165e+00 | -7.917988079669e-02 |
| H                                                | -3.057934491004e+00 | -1.356078103011e+00 | 8.956434571081e-01  |

| $(^2\pi_{\text{H}^+})_{\text{min}}$ @ CASSCF |             |             |             |
|----------------------------------------------|-------------|-------------|-------------|
| N                                            | 0.04455908  | 1.01895461  | 0.07892737  |
| N                                            | -1.17111596 | -1.02611339 | -0.00557138 |
| C                                            | -1.18018731 | 0.43683398  | 0.08127366  |
| C                                            | -0.06483609 | -1.71355182 | -0.07949781 |
| C                                            | 1.20140892  | -1.07497166 | -0.07976734 |
| C                                            | 1.27014312  | 0.36892591  | 0.00360680  |
| O                                            | 2.31583720  | 0.97329184  | 0.00792598  |
| O                                            | -2.22998262 | 0.97452032  | 0.14463531  |

|   |             |             |             |
|---|-------------|-------------|-------------|
| H | -0.14749996 | -2.78855706 | -0.14062770 |
| H | 0.05086684  | 2.02382679  | 0.13818712  |
| H | 2.11150743  | -1.64976074 | -0.14113897 |
| C | -2.50749233 | -1.68305337 | -0.00428530 |
| H | -3.06469982 | -1.30704277 | -0.85483283 |
| H | -2.35654742 | -2.75232424 | -0.07207339 |
| H | -3.01149008 | -1.41182140 | 0.91642848  |

---

$({}^2n_o^+)_{\min}$  @ XMS-CASPT2

---

|   |                     |                     |                     |
|---|---------------------|---------------------|---------------------|
| N | 4.962483687879e-02  | 1.003462090102e+00  | 7.786425285322e-02  |
| N | -1.182345528290e+00 | -1.013020630929e+00 | -4.475777033412e-03 |
| C | -1.235516035344e+00 | 3.854062468208e-01  | 7.988102699744e-02  |
| C | -4.379969133548e-03 | -1.693337133707e+00 | -8.017795181472e-02 |
| C | 1.232795615504e+00  | -1.081627356049e+00 | -8.110789475594e-02 |
| C | 1.228045162683e+00  | 3.441242963869e-01  | 3.435857235332e-03  |
| O | 2.308045704511e+00  | 1.034724136006e+00  | 1.186791283009e-02  |
| O | -2.243839013951e+00 | 1.040471261444e+00  | 1.489243561836e-01  |
| H | -8.663335382033e-02 | -2.782111585786e+00 | -1.422139828506e-01 |
| H | 3.114981410948e-02  | 2.027457199469e+00  | 1.390204605826e-01  |
| H | 2.169651514579e+00  | -1.633830873054e+00 | -1.419548570474e-01 |
| C | -2.492348094356e+00 | -1.698740816764e+00 | -5.757142494372e-03 |
| H | -3.080371889820e+00 | -1.351339347018e+00 | -8.659967715411e-01 |
| H | -2.311833816269e+00 | -2.778575287419e+00 | -7.456400046454e-02 |
| H | -3.026330029505e+00 | -1.457426920132e+00 | 9.233182974666e-01  |

---

$({}^2n_o^+)_{\min}$  @ CASSCF

---

|   |             |             |             |
|---|-------------|-------------|-------------|
| N | 0.05363816  | 0.98853867  | 0.07684787  |
| N | -1.17567658 | -1.00950288 | -0.00444855 |
| C | -1.20288048 | 0.40315035  | 0.07996000  |
| C | -0.04474706 | -1.68252367 | -0.07826718 |
| C | 1.20648741  | -1.07967280 | -0.08020007 |
| C | 1.20022678  | 0.28792248  | 0.00091775  |
| O | 2.30409857  | 1.01707133  | 0.01088427  |
| O | -2.20262873 | 1.02522414  | 0.14680958  |
| H | -0.13082808 | -2.75678862 | -0.13925272 |
| H | 0.06374896  | 1.99501259  | 0.13608735  |
| H | 2.11633276  | -1.65034794 | -0.14132126 |
| C | -2.50061008 | -1.67386486 | -0.00394675 |
| H | -3.06939161 | -1.31408685 | -0.85471715 |
| H | -2.34109892 | -2.74214860 | -0.07193638 |
| H | -3.01620010 | -1.41882632 | 0.91577324  |

---

$({}^2n_o^+ / {}^2\pi_H^+)_{CI}$  @ XMS-CASPT2

---

|   |                     |                     |                     |
|---|---------------------|---------------------|---------------------|
| N | 4.916372212795e-02  | 1.001961433245e+00  | 7.778927628980e-02  |
| N | -1.181731930687e+00 | -1.015892688496e+00 | -4.664247921521e-03 |
| C | -1.248466760929e+00 | 3.644690557799e-01  | 7.901037804980e-02  |
| C | 1.262553156084e-02  | -1.683957859055e+00 | -8.011426585071e-02 |
| C | 1.244623817022e+00  | -1.076118626776e+00 | -8.104967179389e-02 |

|   |                     |                     |                     |
|---|---------------------|---------------------|---------------------|
| C | 1.213825115123e+00  | 3.454331516808e-01  | 4.012676972653e-03  |
| O | 2.290629453319e+00  | 1.068458495400e+00  | 1.440643746718e-02  |
| O | -2.241751220287e+00 | 1.040992393702e+00  | 1.488615797898e-01  |
| H | -6.201141380153e-02 | -2.773048206868e+00 | -1.424013689230e-01 |
| H | 1.092856678961e-02  | 2.025304885604e+00  | 1.394733764649e-01  |
| H | 2.183332685042e+00  | -1.623567415350e+00 | -1.415778115651e-01 |
| C | -2.483264528576e+00 | -1.721641545674e+00 | -7.419873164029e-03 |
| H | -3.074895209976e+00 | -1.388950461857e+00 | -8.699801734890e-01 |
| H | -2.283420507484e+00 | -2.798283500117e+00 | -7.690212673242e-02 |
| H | -3.021220570119e+00 | -1.494870683204e+00 | 9.220433023282e-01  |

$(^2n_o+^2\pi_H^+)_{CI}$  @ CASSCF

---

|   |             |             |             |
|---|-------------|-------------|-------------|
| N | 0.08458307  | 0.98409868  | 0.07153698  |
| N | -1.20342557 | -0.98808468 | -0.00439525 |
| C | -1.22777352 | 0.36647588  | 0.07561308  |
| C | -0.02335211 | -1.67262732 | -0.07737064 |
| C | 1.20789363  | -1.09208223 | -0.07795507 |
| C | 1.18322705  | 0.31374494  | 0.00368535  |
| O | 2.30446790  | 0.99863799  | 0.01164995  |
| O | -2.15500704 | 1.08903672  | 0.14595280  |
| H | -0.10769652 | -2.74522480 | -0.13744674 |
| H | 0.05896507  | 1.99332861  | 0.13160417  |
| H | 2.12573623  | -1.64856077 | -0.13605320 |
| C | -2.51173310 | -1.67316760 | -0.00303843 |
| H | -3.10272920 | -1.34089229 | -0.85050229 |
| H | -2.33159649 | -2.73830870 | -0.07968431 |
| H | -3.04108839 | -1.45721744 | 0.91959358  |

$(^2\pi_{H-1}+^2n_o^+)_{CI}$  @ XMS-CASPT2

---

|   |                     |                     |                     |
|---|---------------------|---------------------|---------------------|
| N | 4.769231801515e-02  | 9.971728797064e-01  | 7.755002819901e-02  |
| N | -1.286148006902e+00 | -9.415633555119e-01 | 2.874961836958e-03  |
| C | -1.160589086792e+00 | 3.718802143355e-01  | -3.766576755831e-01 |
| C | -2.039729614871e-01 | -1.631893478343e+00 | 5.511605892498e-01  |
| C | 1.046416966172e+00  | -1.101885196021e+00 | 7.537466191552e-01  |
| C | 1.329236225997e+00  | 2.785858288454e-01  | 4.314692693595e-01  |
| O | 2.336091754530e+00  | 9.457717908622e-01  | 3.966494089149e-01  |
| O | -1.904979706791e+00 | 1.023433050725e+00  | -1.097504255866e+00 |
| H | -4.172670299880e-01 | -2.676659602409e+00 | 7.915605499123e-01  |
| H | 1.088610273912e-01  | 2.019025546462e+00  | -9.943568767544e-02 |
| H | 1.859386908720e+00  | -1.724677910529e+00 | 1.133495057505e+00  |
| C | -2.538065808931e+00 | -1.630219457690e+00 | -3.936323350133e-01 |
| H | -2.586595476501e+00 | -1.716990916981e+00 | -1.490236390912e+00 |
| H | -2.534658880193e+00 | -2.623099252631e+00 | 7.366935399969e-02  |
| H | -3.395764118878e+00 | -1.045532732728e+00 | -2.639784048114e-02 |

$(^2\pi_{H-1}+^2n_o^+)_{CI}$  @ CASSCF

---

|   |             |             |             |
|---|-------------|-------------|-------------|
| N | 0.04277151  | 0.95698669  | 0.07655721  |
| N | -1.19914888 | -0.99124857 | -0.00214040 |
| C | -1.18968138 | 0.34868953  | 0.07656951  |
| C | -0.00490122 | -1.70098110 | -0.08028705 |
| C | 1.20269384  | -1.11687177 | -0.08223619 |



|   |             |             |             |
|---|-------------|-------------|-------------|
| C | 1.27191003  | 0.32365713  | 0.00072305  |
| O | 2.24942381  | 1.08016721  | 0.01419562  |
| O | -2.15566644 | 1.11877344  | 0.14998091  |
| H | -0.11418308 | -2.77072494 | -0.14036727 |
| H | 0.03730867  | 1.97886251  | 0.13779791  |
| H | 2.12054883  | -1.67726953 | -0.14339697 |
| C | -2.51443015 | -1.66350030 | -0.00305514 |
| H | -3.09821120 | -1.33183576 | -0.85631081 |
| H | -2.34170067 | -2.73000048 | -0.07050678 |
| H | -3.04626266 | -1.43554705 | 0.91566639  |

**Table S6.** Cartesian coordinates (in Å) of the key structures optimised for 3-methyl-uracil.

**FC @ MP2**

---

|   |           |           |           |
|---|-----------|-----------|-----------|
| N | 0.011444  | 1.013000  | -0.000739 |
| N | -1.168998 | -0.990487 | -0.068791 |
| C | -1.233830 | 0.396889  | -0.073510 |
| C | -0.004684 | -1.714262 | 0.000103  |
| C | 1.192889  | -1.095722 | 0.070070  |
| C | 1.260910  | 0.356892  | 0.073114  |
| O | 2.297556  | 1.017040  | 0.133598  |
| O | -2.306050 | 0.990133  | -0.136906 |
| H | -0.118857 | -2.788873 | -0.005902 |
| H | -2.066445 | -1.446351 | -0.121228 |
| H | 2.116929  | -1.646961 | 0.124731  |
| C | 0.054159  | 2.474936  | 0.000814  |
| H | 0.533179  | 2.821424  | 0.912632  |
| H | 0.636710  | 2.820270  | -0.849073 |
| H | -0.965802 | 2.833785  | -0.059362 |

**( ${}^2\pi_{\text{H}^+}$ )<sub>min</sub> @ XMS-CASPT2**

---

|   |                     |                     |                     |
|---|---------------------|---------------------|---------------------|
| N | 1.313430556412e-02  | 1.060779550673e+00  | -1.220269428673e-03 |
| N | -1.152547668896e+00 | -1.025076269035e+00 | -7.030057894365e-02 |
| C | -1.220257627592e+00 | 4.411508052094e-01  | 1.981573674101e-02  |
| C | -4.373345679840e-02 | -1.760181054055e+00 | -1.134651866442e-01 |
| C | 1.193119817884e+00  | -1.094446227631e+00 | -1.083460177434e-01 |
| C | 1.255359771255e+00  | 3.817922995492e-01  | -1.383955468767e-02 |
| O | 2.312510316792e+00  | 9.771537925131e-01  | 5.496512470675e-02  |
| O | -2.310413699475e+00 | 9.435138131409e-01  | 9.649879939731e-02  |
| H | -1.460591601372e-01 | -2.849282871720e+00 | -1.528077774523e-01 |
| H | -2.083726337246e+00 | -1.461789793625e+00 | -6.773560108165e-02 |
| H | 2.140337091770e+00  | -1.638686577013e+00 | -1.436249337146e-01 |
| C | 5.720191844718e-02  | 2.542198056910e+00  | 8.803946586047e-02  |
| H | 4.781061778545e-01  | 2.829904765635e+00  | 1.061313425844e+00  |
| H | 6.996921350743e-01  | 2.916211844250e+00  | -7.194576814656e-01 |
| H | -9.683861416981e-01 | 2.911937145890e+00  | -1.780116751292e-02 |

**( ${}^2\pi_{\text{H}^+}$ )<sub>min</sub> @ CASSCF**

---

|   |             |             |             |
|---|-------------|-------------|-------------|
| N | 0.01575330  | 1.04381528  | 0.00018054  |
| N | -1.13399951 | -1.02833164 | -0.06742853 |

|   |             |             |             |
|---|-------------|-------------|-------------|
| C | -1.18932694 | 0.43163724  | -0.07188169 |
| C | -0.05744871 | -1.75118416 | -0.00311029 |
| C | 1.19400630  | -1.08594814 | 0.07062853  |
| C | 1.22742645  | 0.36207447  | 0.07160876  |
| O | 2.28420542  | 0.95095432  | 0.13312893  |
| O | -2.27386239 | 0.89257452  | -0.13733784 |
| H | -0.15862871 | -2.82820511 | -0.00844523 |
| H | -2.05083669 | -1.46086489 | -0.12165633 |
| H | 2.12062330  | -1.63431126 | 0.12568100  |
| C | 0.05857483  | 2.52707622  | 0.00174257  |
| H | 0.53318430  | 2.86611050  | 0.91618509  |
| H | 0.62771855  | 2.86585389  | -0.85723732 |
| H | -0.95828011 | 2.89046306  | -0.05250708 |

$(^2\text{no}^+)_{\text{min}} @ \text{XMS-CASPT2}$

---

|   |                     |                     |                     |
|---|---------------------|---------------------|---------------------|
| N | 1.231359968220e-02  | 1.029003652306e+00  | -1.230257286441e-03 |
| N | -1.130800671999e+00 | -1.033904712111e+00 | -6.895093274368e-02 |
| C | -1.251102786247e+00 | 3.559627725955e-01  | -7.391777705755e-02 |
| C | 3.930610435673e-02  | -1.720518326963e+00 | 1.517134820306e-03  |
| C | 1.250939886322e+00  | -1.070333730952e+00 | 7.401528651464e-02  |
| C | 1.189885774148e+00  | 3.574761462997e-01  | 6.888895335339e-02  |
| O | 2.259118527739e+00  | 1.069165287110e+00  | 1.302524569599e-01  |
| O | -2.296793375673e+00 | 9.513046339931e-01  | -1.331014870453e-01 |
| H | -3.546467783257e-02 | -2.811056835219e+00 | -2.599517966154e-03 |
| H | -2.022145939341e+00 | -1.532488543253e+00 | -1.207524774865e-01 |
| H | 2.206902824199e+00  | -1.589053770805e+00 | 1.312256629301e-01  |
| C | 2.544250564051e-02  | 2.513241740487e+00  | -1.293474506921e-03 |
| H | 4.874075625036e-01  | 2.865478021239e+00  | 9.329769529132e-01  |
| H | 5.952367152927e-01  | 2.864391564191e+00  | -8.743659258830e-01 |
| H | -1.016971400457e+00 | 2.844947614853e+00  | -6.350648235651e-02 |

$(^2\text{no}^+/^2\pi_{\text{H}}^+)_{\text{CI}} @ \text{XMS-CASPT2}$

---

|   |                     |                     |                     |
|---|---------------------|---------------------|---------------------|
| N | 1.229282025985e-02  | 1.028199119492e+00  | -1.230510168648e-03 |
| N | -1.130351188063e+00 | -1.034665417400e+00 | -6.892229982654e-02 |
| C | -1.251581333391e+00 | 3.535485310833e-01  | -7.979793304593e-02 |
| C | 4.140362596910e-02  | -1.719797906908e+00 | 5.291594147896e-03  |
| C | 1.252097716178e+00  | -1.069797188901e+00 | 7.979481638072e-02  |
| C | 1.188263881474e+00  | 3.572627679077e-01  | 7.354597530695e-02  |
| O | 2.256585399864e+00  | 1.072881901903e+00  | 1.394859192931e-01  |
| O | -2.295521830709e+00 | 9.510643502614e-01  | -1.472688173693e-01 |
| H | -3.254106813776e-02 | -2.810348811633e+00 | 2.964756063485e-03  |
| H | -2.020378086926e+00 | -1.534943149990e+00 | -1.239319465044e-01 |
| H | 2.208019888926e+00  | -1.588064109683e+00 | 1.404949815925e-01  |
| C | 2.486196811395e-02  | 2.512297730828e+00  | -3.535575575894e-03 |
| H | 4.823685366983e-01  | 2.866552804139e+00  | 9.322311111241e-01  |
| H | 5.984866727227e-01  | 2.862391189181e+00  | -8.747088133468e-01 |
| H | -1.017345371966e+00 | 2.843664151970e+00  | -7.133211763539e-02 |

$(^2\text{no}^+/^2\pi_{\text{H}}^+)_{\text{CI}} @ \text{CASSCF}$

---

|   |            |            |             |
|---|------------|------------|-------------|
| N | 0.01291062 | 1.02747960 | -0.00128780 |
|---|------------|------------|-------------|

|   |             |             |             |
|---|-------------|-------------|-------------|
| N | -1.17372377 | -0.99548550 | -0.07129059 |
| C | -1.22450307 | 0.35111103  | -0.07259502 |
| C | 0.00145448  | -1.72661466 | -0.00008526 |
| C | 1.18654256  | -1.11547370 | 0.06991005  |
| C | 1.23465590  | 0.32555398  | 0.07128136  |
| O | 2.24914154  | 1.02282067  | 0.13049565  |
| O | -2.23084182 | 1.02369327  | -0.12949564 |
| H | -0.11441962 | -2.79797863 | -0.00615812 |
| H | -2.05967165 | -1.46210351 | -0.11968517 |
| H | 2.12139985  | -1.64759723 | 0.12601254  |
| C | 0.04235604  | 2.51826525  | -0.00031636 |
| H | 0.53011892  | 2.82350795  | 0.91963161  |
| H | 0.63781434  | 2.82247225  | -0.85483492 |
| H | -0.97412497 | 2.87206353  | -0.06203119 |

$(^2n\text{O}^+ / ^2\pi_{\text{H-1}}^+)_\text{CI}$  @ XMS-CASPT2

---

|   |                     |                     |                     |
|---|---------------------|---------------------|---------------------|
| N | 1.249876431047e-02  | 1.036172813072e+00  | -1.228003862880e-03 |
| N | -1.172262873489e+00 | -1.019934721462e+00 | -7.152047976810e-02 |
| C | -1.271133723485e+00 | 3.514997369311e-01  | -3.753854437246e-02 |
| C | 1.074042046935e-02  | -1.719884861153e+00 | -4.411437551518e-02 |
| C | 1.228075770396e+00  | -1.096221656064e+00 | 1.111867429956e-02  |
| C | 1.289321605132e+00  | 3.454459636680e-01  | 4.486771583694e-02  |
| O | 2.285639037616e+00  | 1.061281999882e+00  | 1.019383045200e-01  |
| O | -2.300200561562e+00 | 9.902786014029e-01  | -3.050450422474e-02 |
| H | -8.649894827152e-02 | -2.807828076359e+00 | -6.537578552152e-02 |
| H | -2.066926176379e+00 | -1.513602499338e+00 | -9.865888967059e-02 |
| H | 2.164079809677e+00  | -1.654778162367e+00 | 3.525629515753e-02  |
| C | 2.517203479016e-02  | 2.501770354585e+00  | 1.239865532153e-02  |
| H | 5.414693039967e-01  | 2.834785323863e+00  | 9.292788816264e-01  |
| H | 6.102949503760e-01  | 2.849878827167e+00  | -8.557198778305e-01 |
| H | -1.009648927403e+00 | 2.856377517688e+00  | -2.322601412920e-02 |

$(^2n\text{O}^+ / ^2\pi_{\text{H-1}}^+)_\text{CI}$  @ CASSCF

---

|   |             |             |             |
|---|-------------|-------------|-------------|
| N | 0.01965622  | 1.02094120  | -0.00056740 |
| N | -1.17113919 | -1.00027224 | -0.07097703 |
| C | -1.20998983 | 0.35463403  | -0.07207286 |
| C | -0.00771906 | -1.72181697 | -0.00047784 |
| C | 1.18443291  | -1.10271972 | 0.06984773  |
| C | 1.20045848  | 0.32846625  | 0.06930602  |
| O | 2.24611860  | 1.01517762  | 0.12988912  |
| O | -2.23013853 | 0.99984931  | -0.13067323 |
| H | -0.11429309 | -2.79495715 | -0.00588259 |
| H | -2.06103006 | -1.46253497 | -0.11972670 |
| H | 2.11854028  | -1.63554040 | 0.12581811  |
| C | 0.05464009  | 2.51218071  | 0.00070525  |
| H | 0.53236931  | 2.83026905  | 0.92183575  |
| H | 0.63909204  | 2.82926759  | -0.85702620 |
| H | -0.96188880 | 2.86877001  | -0.06044700 |

**Effective 3-state ( ${}^2\pi_{H-1}^+ / {}^2n_{O}^+ / {}^2\pi_{H^+}$ ) CI**

|   |                     |                     |                     |
|---|---------------------|---------------------|---------------------|
| N | 1.265517205086e-02  | 1.042228571379e+00  | -1.226100405991e-03 |
| N | -1.148171422378e+00 | -1.058821954800e+00 | -6.998821584565e-02 |
| C | -1.246492266722e+00 | 2.765862799873e-01  | -1.617135878422e-01 |
| C | 8.922303526758e-02  | -1.712078268991e+00 | -9.183390055909e-02 |
| C | 1.270737592685e+00  | -1.051110213658e+00 | 6.086278844183e-02  |
| C | 1.255342361348e+00  | 3.932186976985e-01  | 2.206948321904e-01  |
| O | 2.211599562237e+00  | 1.109208035025e+00  | 4.827804338228e-01  |
| O | -2.259283232097e+00 | 9.367858469287e-01  | -3.397636863067e-01 |
| H | 3.890625476156e-02  | -2.800170771217e+00 | -1.950732059745e-01 |
| H | -2.014221570065e+00 | -1.579118291918e+00 | -2.125199876977e-01 |
| H | 2.230563718447e+00  | -1.570204536848e+00 | 5.001969444840e-02  |
| C | -5.486826417191e-02 | 2.512091822136e+00  | -5.607833413265e-02 |
| H | 4.954963065404e-01  | 2.902445655577e+00  | 8.210385641979e-01  |
| H | 4.245438614215e-01  | 2.860797783417e+00  | -9.936159956714e-01 |
| H | -1.117874510380e+00 | 2.808844496272e+00  | -4.289524426015e-02 |

**Table S7.** Cartesian coordinates (in Å) of the key structures optimised for 5-methyl-uracil.

**FC @ MP2**

|   |             |             |            |
|---|-------------|-------------|------------|
| N | -0.73042433 | 1.02831388  | 1.50040508 |
| N | -1.11959596 | -1.25083963 | 1.49936974 |
| C | -1.68668649 | 0.01854766  | 1.49992376 |
| C | 0.24493500  | -1.48786022 | 1.49935378 |
| C | 1.16162501  | -0.47764858 | 1.49999124 |
| C | 2.64505357  | -0.70274870 | 1.50024183 |
| C | 0.67237854  | 0.90503455  | 1.50047264 |
| O | 1.39115818  | 1.90590203  | 1.50090104 |
| O | -2.89742344 | 0.22050628  | 1.49997039 |
| H | 0.53703822  | -2.54049021 | 1.49893642 |
| H | -1.10155397 | 1.98245134  | 1.50111563 |
| H | -1.78550672 | -2.02187217 | 1.49850342 |
| H | 2.87278305  | -1.77793333 | 1.49850109 |
| H | 3.10290555  | -0.23649919 | 2.38698362 |
| H | 3.10354633  | -0.23347637 | 0.61544174 |

**( ${}^2\pi_{H^+}$ )<sub>min</sub> @ XMS-CASPT2**

|   |              |              |             |
|---|--------------|--------------|-------------|
| N | -0.750620641 | 1.062979007  | 1.503598236 |
| N | -1.077481632 | -1.274531801 | 1.499049431 |
| C | -1.686256378 | 0.051152895  | 1.466711953 |
| C | 0.234336509  | -1.527583713 | 1.52409379  |
| C | 1.164134366  | -0.46941122  | 1.528604495 |
| C | 2.632846608  | -0.675394426 | 1.549617585 |
| C | 0.651939185  | 0.93816044   | 1.510153152 |
| O | 1.387193055  | 1.899949692  | 1.502388008 |
| O | -2.880862343 | 0.153530652  | 1.417884791 |
| H | 0.543411332  | -2.577970424 | 1.540408847 |
| H | -1.12631144  | 2.018014373  | 1.483718644 |
| H | -1.765202707 | -2.037519837 | 1.488979721 |

|   |             |              |             |
|---|-------------|--------------|-------------|
| H | 2.905000222 | -1.738585104 | 1.567814923 |
| H | 3.061388959 | -0.156465997 | 2.426555421 |
| H | 3.081990349 | -0.182291951 | 0.667893342 |

---

$(^2\pi_{H^+})_{\min}$  @ CASSCF

---

|   |             |             |            |
|---|-------------|-------------|------------|
| N | -0.73848714 | 1.06613357  | 1.49769368 |
| N | -1.06304621 | -1.24982892 | 1.50172196 |
| C | -1.65120095 | 0.06667795  | 1.50016018 |
| C | 0.20245897  | -1.50522181 | 1.50115420 |
| C | 1.16085129  | -0.44460487 | 1.49876514 |
| C | 2.63195349  | -0.70736184 | 1.50003710 |
| C | 0.64791730  | 0.91465572  | 1.49738515 |
| O | 1.38481643  | 1.87521554  | 1.49615017 |
| O | -2.83560131 | 0.12390878  | 1.50110505 |
| H | 0.50425488  | -2.54405181 | 1.50240929 |
| H | -1.10020657 | 2.00470736  | 1.49693174 |
| H | -1.74346854 | -2.00294266 | 1.50322075 |
| H | 2.84385044  | -1.77239818 | 1.48385278 |
| H | 3.07941336  | -0.26132329 | 2.38760243 |
| H | 3.08672709  | -0.23217821 | 0.63192178 |

---

$(^2n_{O^+})_{\min}$  @ XMS-CASPT2

---

|   |              |              |             |
|---|--------------|--------------|-------------|
| N | -0.719752688 | 1.049864413  | 1.499332011 |
| N | -1.116870922 | -1.249196922 | 1.50007868  |
| C | -1.701968701 | 0.013050034  | 1.54116504  |
| C | 0.225905661  | -1.4878875   | 1.47539416  |
| C | 1.173886569  | -0.483716462 | 1.466588655 |
| C | 2.664667608  | -0.693149902 | 1.444381742 |
| C | 0.622633362  | 0.845302577  | 1.485631619 |
| O | 1.3814028    | 1.875618663  | 1.489798887 |
| O | -2.879547867 | 0.252975711  | 1.596971518 |
| H | 0.521197011  | -2.541120654 | 1.466192831 |
| H | -1.096551054 | 2.003522331  | 1.523800626 |
| H | -1.77840144  | -2.028507953 | 1.517683869 |
| H | 2.893412304  | -1.769248794 | 1.429911397 |
| H | 3.137304163  | -0.253271521 | 2.337508691 |
| H | 3.113527182  | -0.235364171 | 0.548154875 |

---

$(^2n_{O^+})_{\min}$  @ CASSCF

---

|   |             |             |            |
|---|-------------|-------------|------------|
| N | -0.71274965 | 1.03961511  | 1.49933818 |
| N | -1.10422813 | -1.24680879 | 1.50008158 |
| C | -1.67765138 | 0.01171759  | 1.50018827 |
| C | 0.22254807  | -1.47339028 | 1.50017227 |
| C | 1.15465246  | -0.46757678 | 1.50009465 |
| C | 2.64931769  | -0.68628683 | 1.50055585 |
| C | 0.59000566  | 0.82082342  | 1.49942454 |
| O | 1.35592274  | 1.88116514  | 1.49835664 |
| O | -2.83349734 | 0.24117275  | 1.50071347 |
| H | 0.51984145  | -2.51142232 | 1.50072805 |
| H | -1.08033639 | 1.97991686  | 1.49919072 |

|   |             |             |            |
|---|-------------|-------------|------------|
| H | -1.75093897 | -2.01690995 | 1.49959852 |
| H | 2.86383832  | -1.75057938 | 1.49224216 |
| H | 3.10546944  | -0.25198293 | 2.38860146 |
| H | 3.10803855  | -0.23806629 | 0.62082505 |

$(^2n_{O^+}/^2\pi_{H^+})_{CI}$  @ XMS-CASPT2

---

|   |              |              |             |
|---|--------------|--------------|-------------|
| N | -0.708392845 | 1.050658708  | 1.50001412  |
| N | -1.128839847 | -1.247898851 | 1.499586016 |
| C | -1.724103117 | -0.004124406 | 1.453122688 |
| C | 0.222887236  | -1.474668659 | 1.519365065 |
| C | 1.178068654  | -0.48747309  | 1.544360211 |
| C | 2.676646059  | -0.687799393 | 1.573810499 |
| C | 0.603034234  | 0.819625851  | 1.510968613 |
| O | 1.401432679  | 1.876137786  | 1.501612764 |
| O | -2.882558884 | 0.269146302  | 1.401160152 |
| H | 0.519570321  | -2.529775099 | 1.526894195 |
| H | -1.094661892 | 2.00020545   | 1.460937045 |
| H | -1.775786776 | -2.038039489 | 1.471953451 |
| H | 2.913581357  | -1.764259714 | 1.477829962 |
| H | 3.118587172  | -0.334265765 | 2.513237789 |
| H | 3.161438338  | -0.169341403 | 0.723995629 |

$(^2n_{O^+}/^2\pi_{H^+})_{CI}$  @ CASSCF

---

|   |             |             |            |
|---|-------------|-------------|------------|
| N | -0.70016013 | 1.03840403  | 1.50001500 |
| N | -1.12859349 | -1.25179607 | 1.49958629 |
| C | -1.68486913 | -0.01291148 | 1.50021800 |
| C | 0.23244258  | -1.47358764 | 1.49922702 |
| C | 1.15359459  | -0.48862115 | 1.49984919 |
| C | 2.65302096  | -0.67769532 | 1.50046168 |
| C | 0.57469588  | 0.81275260  | 1.50022466 |
| O | 1.36391509  | 1.86465357  | 1.50027202 |
| O | -2.82246459 | 0.29088368  | 1.50064392 |
| H | 0.52837767  | -2.51074319 | 1.49899507 |
| H | -1.08766105 | 1.97203444  | 1.49992063 |
| H | -1.76674847 | -2.02383003 | 1.49904169 |
| H | 2.88158475  | -1.73864328 | 1.49685433 |
| H | 3.10572102  | -0.23778385 | 2.38860719 |
| H | 3.10737683  | -0.23172900 | 0.61619472 |

$(^2\pi_{H^{-1}}/^2n_{O^+})_{CI}$  @ XMS-CASPT2

---

|   |               |               |              |
|---|---------------|---------------|--------------|
| N | -0.7509059590 | 1.0576904554  | 1.4987132250 |
| N | -1.1988909091 | -1.2159310167 | 1.5008882672 |
| C | -1.6674748800 | 0.0131487768  | 1.8619540818 |
| C | 0.1378479247  | -1.4552590671 | 1.1556460330 |
| C | 1.1154834321  | -0.4958051157 | 1.1255304017 |
| C | 2.5653599299  | -0.7854973061 | 0.8442838917 |
| C | 0.7461069224  | 0.8794327796  | 1.4223526114 |
| O | 1.4015924345  | 1.8765924116  | 1.6220560775 |
| O | -2.6703570878 | 0.3192083227  | 2.4912714872 |
| H | 0.3556981919  | -2.5031152871 | 0.9407418840 |

|   |               |               |               |
|---|---------------|---------------|---------------|
| H | -1.1028851311 | 2.0266971409  | 1.6341435339  |
| H | -1.8092460054 | -2.0077511901 | 1.7202099208  |
| H | 2.7143286313  | -1.8534265045 | 0.6319169021  |
| H | 3.1832723652  | -0.5063440631 | 1.7119004253  |
| H | 2.9146296365  | -0.1975709473 | -0.0187847384 |

---

( $^2\pi_{H-1}^+/^2n_{O^+}$ )<sub>CI</sub> @ CASSCF

---

|   |             |             |            |
|---|-------------|-------------|------------|
| N | -0.72083939 | 1.01541889  | 1.49875430 |
| N | -1.12605354 | -1.25149271 | 1.50092361 |
| C | -1.64776604 | -0.01188348 | 1.49999280 |
| C | 0.24929975  | -1.49272791 | 1.50064241 |
| C | 1.16030276  | -0.49803260 | 1.49957054 |
| C | 2.65308652  | -0.69826728 | 1.50039418 |
| C | 0.64024968  | 0.85933625  | 1.49887539 |
| O | 1.28490807  | 1.92145244  | 1.49786404 |
| O | -2.82257892 | 0.31372787  | 1.50027961 |
| H | 0.52475850  | -2.53430222 | 1.50124698 |
| H | -1.09333387 | 1.96483726  | 1.49803793 |
| H | -1.77598050 | -2.01596727 | 1.50168384 |
| H | 2.88523579  | -1.75887395 | 1.48850597 |
| H | 3.09764520  | -0.25111663 | 2.38782235 |
| H | 3.10129853  | -0.23072131 | 0.62551745 |
